String pulling performance

| Number | Sex | Trials | Latency (s) | Log (latency) | Success/Fail | 2nd Latency (s) |
|--------|-----|--------|-------------|---------------|--------------|-----------------|
| A12.O  | F   | 2      | 342         | 2.5340        | S            | 62              |
| A14.O  | F   | 5      | 1395        | 3.1446        | S            | 59              |
| A16.O  | M   | 11     | 3001        | 3.4773        | F            | NA              |
| A17.O  | M   | 11     | 3001        | 3.4773        | F            | NA              |
| A5.V   | M   | 2      | 600         | 2.7782        | S            | NA              |
| B10.V  | M   | 3      | 767         | 2.8848        | S            | 33              |
| B11.V  | M   | 3      | 732         | 2.8645        | S            | 30              |
| B12.O  | F   | 11     | 3001        | 3.4773        | F            | NA              |
| B12.V  | M   | 11     | 3001        | 3.4773        | F            | NA              |
| B13.V  | M   | 10     | 2990        | 3.4757        | S            | 60              |
| B14.V  | F   | 11     | 3001        | 3.4773        | F            | NA              |
| B15.O  | M   | 1      | 282         | 2.4502        | S            | 110             |
| B15.V  | F   | 11     | 3001        | 3.4773        | F            | NA              |
| B16.O  | F   | 11     | 3001        | 3.4773        | F            | NA              |
| B16.V  | F   | 11     | 3001        | 3.4773        | F            | NA              |
| B17.O  | M   | 2      | 450         | 2.6532        | S            | 8               |
| B17.V  | F   | 3      | 862         | 2.9355        | S            | 105             |
| B18.O  | M   | 4      | 1154        | 3.0622        | S            | 15              |
| B18.V  | F   | 11     | 3001        | 3.4773        | F            | NA              |
| B19.O  | M   | 4      | 1170        | 3.0682        | S            | 60              |
| B19.V  | M   | 11     | 3001        | 3.4773        | F            | NA              |
| B2.V   | M   | 5      | 1296        | 3.1126        | S            | 120             |
| B20.O  | M   | 11     | 3001        | 3.4773        | F            | NA              |
| B23.O  | F   | 11     | 3001        | 3.4773        | F            | NA              |
| B24.O  | F   | 11     | 3001        | 3.4773        | F            | NA              |
| B25.O  | F   | 10     | 2767        | 3.4420        | S            | 301             |
| B26.O  | F   | 11     | 3001        | 3.4773        | F            | NA              |
| B27.O  | M   | 11     | 3001        | 3.4773        | F            | NA              |
| B28.O  | F   | 8      | 2300        | 3.3617        | S            | 51              |
| B29.O  | F   | 2      | 398         | 2.5999        | S            | 119             |
| B3.V   | F   | 11     | 3001        | 3.4773        | F            | NA              |
| B30.O  | M   | 11     | 3001        | 3.4773        | F            | NA              |
| B4.V   | M   | 1      | 120         | 2.0792        | S            | 50              |
| B6.V   | M   | 11     | 3001        | 3.4773        | F            | NA              |
| B7.O   | F   | 11     | 3001        | 3.4773        | F            | NA              |
| B7.V   | M   | 11     | 3001        | 3.4773        | F            | NA              |
| B8.O   | NA  | 11     | 3001        | 3.4773        | F            | NA              |
| B8.V   | F   | 11     | 3001        | 3.4773        | F            | NA              |
| B9.V   | F   | 11     | 3001        | 3.4773        | F            | NA              |
| P5.O   | M   | 7      | 2070        | 3.3160        | S            | 75              |
| P6.V   | F   | 11     | 3001        | 3.4773        | F            | NA              |
| SP1.V  | M   | 3      | 737         | 2.8675        | S            | 22              |
